# Supplementary material for: Spatial Transmission of Swine Vesicular Disease Virus in the 2006–2007 Epidemic in Lombardy
Source: PLoS One. 2013 May 7;8(5):e62878. doi: 10.1371/journal.pone.0062878 (PMC3647039; doi:10.1371/journal.pone.0062878)
Supplement: Table S3 — Number of newly infected and infectious farms per week for period 1. (DOC) [file pone.0062878.s003.doc]

**Table S3. Number of newly infected and infectious farms per week for period 1.**

| **Week** | **Newly infecteda** | **Infectiousb** |
| --- | --- | --- |
| 22 Sep 2006 | 6 | 0 |
| 29 Sep 2006 | 2 | 6 |
| 06 Oct 2006 | 4 | 8 |
| 13 Oct 2006 | 2 | 12 |
| 20 Oct 2006 | 4 | 14 |
| 27 Oct 2006 | 0 | 18 |
| 02 Nov 2006 | 4 | 18 |
| 09 Nov 2006 | 8 | 22 |
| 16 Nov 2006 | 1 | 30 |
| 23 Nov 2006 | 0 | 30 |
| 30 Nov 2006 | 0 | 30 |
| 07 Dec 2006 | 1 | 22 |
| 14 Dec 2006 | 1 | 22 |
| 21 Dec 2006 | 0 | 11 |
| 28 Dec 2006 | 1 | 7 |
| 04 Jan 2007 | 0 | 7 |
| 11 Jan 2007 | 0 | 4 |
| 18 Jan 2007 | 0 | 3 |
| 25 Jan 2007 | 0 | 2 |
| 01 Feb 2007 | 0 | 2 |
| 08 Feb 2007 | 0 | 1 |
| 15 Feb 2007 | 0 | 1 |

anumber of newly infected farms for each week of the epidemic, as calculated from the estimated dates of virus introduction onto the outbreak farms.

bnumber of infectious farms, as estimated from the outbreak data, present at the corresponding week of the epidemic. NB: Two sets of two outbreaks in the province of Mantua were each grouped together because the herds could be considered as part of the same epidemiological unit.
